# Supplementary material for: Nutritional Conditions Modulate C. neoformans Extracellular Vesicles’ Capacity to Elicit Host Immune Response
Source: MDPI journal article supplement (doi:10.3390/microorganisms8111815), 2020-11-18
Supplement: s1 [file s1]

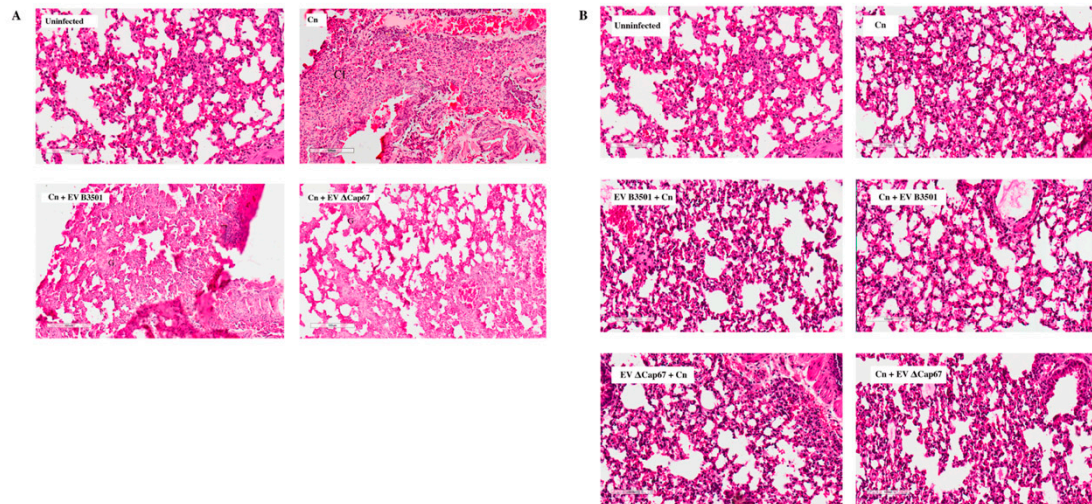

**Figure S1.** Treatment of infected mice with EVs reduced inflammation and cellular infiltration in lungs with 5 dpi. C57Bl/6 mice were infected with *C. neoformans* ( $2 \times 10^4$  cells/animal) intratracheally and treated intranasally with 50 μg of EVs (protein content) produced in SDB 100%. Mice were treated one and three dpi and euthanized at 5 dpi (**A**) or treated two and four dpi and euthanized at 15 dpi (**B**). Lungs were removed, and fragments were separated for hematoxylin-eosin stain and histopathological analysis. In figure: G: granulomas; CI: cellular infiltrate. Magnification of 40× and bar represents 100 μm.
